# Supplementary material for: Primary Diffuse Large B-Cell Lymphoma of the Urinary Bladder: Update on a Rare Disease and Potential Diagnostic Pitfalls
Source: MDPI journal article supplement (doi:10.3390/curroncol29020081), 2022-02-10
Supplement: s1 [file s1]

Supplementary

# Primary Diffuse Large B-Cell Lymphoma of the Urinary Bladder: Update on a Rare Disease and Potential Diagnostic Pitfalls

Magda Zanelli, Francesca Sanguedolce, Maurizio Zizzo, Andrea Palicelli, David Pellegrini, Sabrina Farinacci, Alessandra Soriano, Elisabetta Froio, Luigi Cormio, Giuseppe Carrieri, Alberto Cavazza, Francesco Merli, Stefano A. Pileri and Stefano Ascani

**Table 1.** Aggressive lymphomas of B-cell origin primarily affecting the UB.

|                 | IS                          | Localization                                                                      | UB                           | Histology                                                                | EBER;<br>HHV8                                             | Genetic profile                                                                | Prognosis                                  |
|-----------------|-----------------------------|-----------------------------------------------------------------------------------|------------------------------|--------------------------------------------------------------------------|-----------------------------------------------------------|--------------------------------------------------------------------------------|--------------------------------------------|
| DLBCL,NOS       | Rarely present              | Nodal and ex-tranodal                                                             | 60.3% of primary UB lymphoma | Sheets of CBs or IBs                                                     | EBER -;<br>HHV8 -                                         | Monoclonal (IG gene rearrangement)                                             | Potentially curable                        |
| EBV+ DLBCL, NOS | Rarely present              | Nodal (often in young) and extranodal sites (old patients)                        | Rare                         | 2 patterns of growth: Polymorphic or monomorphic                         | EBER +;<br>HHV8 -                                         | Monoclonal (IG gene rearrangement)                                             | Poor                                       |
| PBL             | Mostly present (often HIV+) | Extranodal sites mainly; nodal sites rarely                                       | Rare                         | PBs, IBs (diffuse pattern of growth)                                     | EBER + in HIV+ pts and PT pts;<br>HHV8 -                  | Monoclonal (IG gene rearrangement); MYC translocation (half of cases)          | Poor                                       |
| PEL             | Mostly present (often HIV+) | Classic PEL: serous cavities. EC-PEL: nodal sites mostly; extranodal sites rarely | Rare (EC-PEL)                | PBs, IBs (diffuse pattern of growth in EC-PEL; in fluids in classic PEL) | EBER + (- in elderly HIV-negative pts);<br>HHV8 +         | Monoclonal (IG genes hypermutated)                                             | Poor                                       |
| BL              | Present in the immunodef.   | Extranodal sites mainly; nodal sites in the Immunodef.                            | Rare                         | Medium-sized cells (diffuse monotonous pattern of growth)                | EBER+ in >95% end.; 20–30% spor.; 25–40% immunodef. HHV8- | Monoclonal (IG gene rearrangement); MYC translocation (the majority of cases); | Highly aggressive, but potentially curable |

**Legend:** BL: Burkitt lymphoma; CBs: centroblasts; DLBCL: diffuse large B-cell lymphoma; EBER: in situ hybridization for EBV-encoded RNA; EBV: Epstein-Barr virus; EBV+ DLBCL, NOS: EBV-positive, diffuse large B-cell lymphoma, not otherwise specified; EC-PEL: extra-cavitary primary effusion lymphoma; end: endemic variant; HHV8: Human herpes virus 8; HHV8+ HIV: human immunodeficiency virus; IBs: immunoblasts; Immunodef: immunodeficiency-associated variant; IG immunoglobulin; IS: immunosuppression; PBL: plasmablastic lymphoma; PBs: plasmablasts; PEL: primary effusion lymphoma; spor: sporadic variant; UB: urinary bladder.
